# Supplementary material for: Analysis of Cross-Association between mRNA Expression and RNAi Efficacy for Predictive Target Discovery in Colon Cancers
Source: MDPI journal article supplement (doi:10.3390/cancers12113091), 2020-10-23
Supplement: s1 [file s1]

# Analysis of Cross-Association between mRNA Expression and RNAi Efficacy for Predictive Target Discovery in Colon Cancers

Euna Jeong, Yejin Lee, Youngju Kim, Jieun Lee and Sukjoon Yoon

**Table S1.** Major functional classes of 20 genes with high RNAi efficacy in Figure 1.

| Functional Category | Genes           | Full Name                                            | Hit    |
|---------------------|-----------------|------------------------------------------------------|--------|
| Transcription       | <i>BUB3</i>     | BUB3 mitotic checkpoint protein                      | sgRNA  |
|                     | <i>CTNNB1</i>   | catenin beta 1                                       | shRNA  |
|                     | <i>POLR2L</i>   | RNA polymerase II subunit L                          | sgRNA  |
|                     | <i>RAN</i>      | RAN, member RAS oncogene family                      | sgRNA  |
|                     | <i>SF3B2</i>    | splicing factor 3b subunit 2                         | shRNA  |
|                     | <i>SNRNP200</i> | small nuclear ribonucleoprotein U5 subunit 200       | sgRNA  |
|                     | <i>SNRPD1</i>   | small nuclear ribonucleoprotein D1 polypeptide       | common |
| Translation         | <i>EEF2</i>     | eukaryotic translation elongation factor 2           | sgRNA  |
|                     | <i>EIF3B</i>    | eukaryotic translation initiation factor 3 subunit B | shRNA  |
|                     | <i>RPL14</i>    | ribosomal protein L14                                | shRNA  |
|                     | <i>RPL37</i>    | ribosomal protein L37                                | sgRNA  |
|                     | <i>RPL5</i>     | ribosomal protein L5                                 | shRNA  |
|                     | <i>RPL7</i>     | ribosomal protein L7                                 | shRNA  |
|                     | <i>RPS15A</i>   | ribosomal protein S15a                               | shRNA  |
| Protein metabolism  | <i>SARS1</i>    | seryl-tRNA synthetase 1                              | sgRNA  |
|                     | <i>HSPE1</i>    | heat shock protein family E (Hsp10) member 1         | sgRNA  |
|                     | <i>PSMB3</i>    | proteasome 20S subunit beta 3                        | sgRNA  |
|                     | <i>RBX1</i>     | ring-box 1                                           | shRNA  |
|                     | <i>UBA1</i>     | ubiquitin like modifier activating enzyme 1          | sgRNA  |
|                     | <i>USP39</i>    | ubiquitin specific peptidase 39                      | shRNA  |

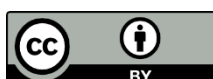

© 2020 by the authors. Licensee MDPI, Basel, Switzerland. This article is an open access article distributed under the terms and conditions of the Creative Commons Attribution (CC BY) license (<http://creativecommons.org/licenses/by/4.0/>).
